# Supplementary material for: Orbital marginal zone B-cell lymphoma of mucosa-associated lymphoid tissue with amyloidosis: a case series and review of the literature
Source: publisher site journal article supplement (doi:10.1515/oncologie-2025-0039), 2025-05-01
Supplement: Supplementary file 1 [file j_oncologie-2025-0039_suppl_001.docx]

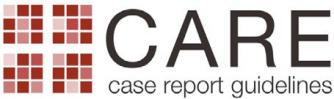

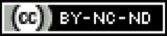

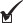
**CARE Checklist of information to include when writing a case report**

| **Topic** | **Item No** | **Checklist item description** | **Reported on Page Number/Line Number** | **Reported on Section/Paragraph** |
| --- | --- | --- | --- | --- |
| Title | 1 | The diagnosis or intervention of primary focus followed by the words “case report” | Line 2-3 | Title |
| Key Words | 2 | 2 to 5 key words that identify diagnoses or interventions in this case report, including "case report" | Line 29-30 | Abstract/Keywords |
| Abstract  (Structured summary) | 3a | Background: state what is known and unknown; why the case report is unique and what it adds to existing literature. | Line 10-50 | Abstract/Background |
| 3b | Case Description: describe the patient’s demographic details, main symptoms, history, important clinical findings, the main diagnosis, interventions, outcomes and follow-ups. | Line 51-169 | Abstract/Case Description |
| 3c | Conclusions: summarize the main take-away lesson, clinical impact and potential implications. | Line 237-243 | Abstract/Conclusions |
| Introduction | 4 | One or two paragraphs summarizing why this case is unique **(may include references)** | Line 47-50, line 237-243 | *Introduction* Section |
| Patient Information | 5a | De-identified patient specific information | yes |  |
| 5b | Primary concerns and symptoms of the patient | Line 61-65,124-129,157-160 | Case Description |
| 5c | Medical, family, and psycho-social history including relevant genetic information | Line 124 | Case Description |
| 5d | Relevant past interventions with outcomes | Line 124-126 | Case Description |
| Clinical Findings | 6 | Describe significant physical examination (PE) and important clinical findings | Line 74-78,131-139,161-165 | Case Description |
| Timeline | 7 | Historical and current information from this episode of care organized as a timeline | Figure 1, line 61-169 | Case Description |
| Diagnostic Assessment | 8a | Diagnostic testing (such as PE, laboratory testing, imaging, surveys). | Line62-79,126-137, 158-157 | Case Description |
| 8b | Diagnostic challenges (such as access to testing, financial, or cultural) | Line 200-202 | Discussion |
| 8c | Diagnosis (including other diagnoses considered) | No |  |
| 8d | Prognosis (such as staging in oncology) where applicable | Line83-87, 141-142,167-169 | Case Description |
| Therapeutic Intervention | 9a | Types of therapeutic intervention (such as pharmacologic, surgical, preventive, self-care) | Line 81-87,139-142,167 | Case Description |
| 9b | Administration of therapeutic intervention (such as dosage, strength, duration) | Line 81-87,139-142 | Case Description |
| 9c | Changes in therapeutic intervention (with rationale) | Line 210-234 | Discussion |

| Follow-up and Outcomes | 10a | Clinician and patient-assessed outcomes (if available) | Line83-87, 141-142,167-169 | Case Description |
| --- | --- | --- | --- | --- |
| 10b | Important follow-up diagnostic and other test results | Line83-87, 141-142,167-169 | Case Description |
| 10c | Intervention adherence and tolerability (How was this assessed?) | No |  |
| 10d | Adverse and unanticipated events | Line 85-87 | Case Description |
| Discussion | 11a | A scientific discussion of the strengths AND limitations associated with this case report | Line 237-243 | Discussion |
| 11b | Discussion of the relevant medical literature **with references** | Line 170-236 | Discussion |
| 11c | The scientific rationale for any conclusions (including assessment of possible causes) | Line 203-209,237-243 | Discussion |
| 11d | The primary “take-away” lessons of this case report (without references) in a one paragraph conclusion | Line 237-243 | Discussion |
| Patient Perspective | 12 | The patient should share their perspective in one to two paragraphs on the treatment(s) they received | Line56-57 |  |
| Informed Consent | 13 | Did the patient give informed consent? Please provide if requested | **Yes √** | **No** |

*As the checklist was provided upon initial submission, the page number/line number reported may be changed due to copyediting and may not be referable in the published version. In this case, the section/paragraph may be used as an alternative reference.
